# Supplementary material
Source: PubMed Central journal article supplement (PMC7474673)
Supplement: pnas.2011249117.sapp.pdf [file pnas.2011249117.sapp.pdf]

Supplementary Information for

**Autoantibodies against CNS Antigens in a Subset of B Cell-Dominant Multiple Sclerosis Patients**

Stefanie Kuerten<sup>a,1,2</sup>, Tobias V. Lanz<sup>b,c,d,1,2</sup>, Nithya Lingampalli<sup>b,c</sup>, Lauren J. Lahey<sup>b,c</sup>, Christoph Kleinschnitz<sup>e</sup>, Mathias Mäurer<sup>f</sup>, Michael Schroeter<sup>g</sup>, Stefan Braune<sup>h</sup>, Tjalf Ziemssen<sup>i</sup>, Peggy P. Hoj, William H. Robinson<sup>b,c,3</sup>, Lawrence Steinman<sup>j,2,3</sup>

Paste Lawrence Steinman  
Email: [steinman@stanford.edu](mailto:steinman@stanford.edu)

**This PDF file includes:**

Figures S1 to S4  
Tables S1 to S5

Supernatants  
ELISpot-neg vs. ELISpot-pos

overlap

Supernatants  
HC / OND vs. ELISpot-pos

|                 |             |                |
|-----------------|-------------|----------------|
| AQP4 221-240    | AQP4 61-80  | ADCYAP1 27     |
| CRYAB 91-110    | AQP4 71-90  | ADCYAP1 38     |
| mMAG 97-112     | AQP4 91-110 | AQP4 1-20      |
| MOBP 141-160    | CRYAB 1-20  | AQP4 11-30     |
| NEFL            | CRYAB 21-40 | AQP4 231-250   |
| OSP 161-180     | CRYAB 71-91 | BDNF           |
| OSP 21-40       | MBP         | CNP 343-362    |
| OSP 31-50       | MBP 130-151 | CRYAB 141-161  |
| PLP 1-20        | MBP 71-90   | CRYAB 81-100   |
| PLP 131-150     | MBP 81-100  | GFAP           |
| PLP 211-230     | MOBP 21-40  | MBP 110-131    |
| PLP 241-260     | MOBP 61-80  | MBP 160-181    |
| PLP 89-106 acet | MOG 101-120 | MBP 91-110     |
| PRP             | MOG 91-110  | mMAG 121-136   |
| PRPH            | NEFH        | MOBP 51-70     |
| TRPV1           | OSP 121-140 | MOBP 71-90     |
|                 | OSP 131-150 | MOBP 81-100    |
|                 | OSP 181-200 | MOG 21-40      |
|                 | OSP 51-70   | MOG 61-80      |
|                 | P0-MaIE     | Neuropeptide K |
|                 | PLP 11-30   | OSP 101-120    |
|                 | PLP 141-160 | OSP 11-30      |
|                 | PLP 151-170 | OSP 151-170    |
|                 | PLP 161-180 | OSP 171-190    |
|                 | PLP 171-190 | OSP 191-210    |
|                 | PLP 181-200 | PLP 21-40      |
|                 | PLP 191-210 | PLP 261-277    |
|                 | PLP 231-250 | PLP 41-60      |
|                 | PLP 251-270 | PLP 51-70      |
|                 | PLP 61-80   | PLP 91-110     |
|                 | PLP 71-90   |                |
|                 | PMP2 2      |                |
|                 | S100B       |                |
|                 | SCN3A Cter  |                |
|                 | SCN8A Cter  |                |
|                 | SCN8A L1    |                |
|                 | SCN8A L3    |                |
|                 | SCN8A Nter  |                |
|                 | SNCG        |                |
|                 | TAU         |                |
|                 | TUBB3       |                |

**Supplementary Figure S1: Comparison of IgG reactivity in B cell supernatants.** Venn diagram showing the names of significant antigens in the comparisons “ELISpot-neg vs. ELISpot-pos (supernatants)” (orange) and “HC/OND vs. ELISpot-pos (supernatants)” (green), corresponding to Fig. 2B.

| Supernatants<br>ELISpot-neg vs.<br>ELISpot-pos | overlap      | Plasma<br>HC / OND vs.<br>MS |
|------------------------------------------------|--------------|------------------------------|
| AQP4 61-80                                     | AQP4 221-240 | AQP4 101-120                 |
| AQP4 91-110                                    | AQP4 71-90   | AQP4 11-30                   |
| CRYAB 1-20                                     | CRYAB 21-40  | AQP4 111-130                 |
| MBP                                            | CRYAB 71-91  | AQP4 121-140                 |
| MBP 130-151                                    | CRYAB 91-110 | AQP4 131-150                 |
| MBP 71-90                                      | mMAG 97-112  | AQP4 141-160                 |
| MBP 81-100                                     | PLP 1-20     | AQP4 151-170                 |
| MOBP 141-160                                   | PLP 171-190  | AQP4 171-190                 |
| MOBP 21-40                                     | PLP 211-230  | AQP4 181-200                 |
| MOBP 61-80                                     |              | AQP4 191-210                 |
| MOG 101-120                                    |              | AQP4 201-220                 |
| MOG 91-110                                     |              | AQP4 21-40                   |
| NEFH                                           |              | AQP4 231-250                 |
| NEFL                                           |              | AQP4 261-280                 |
| OSP 121-140                                    |              | AQP4 271-290                 |
| OSP 131-150                                    |              | AQP4 281-300                 |
| OSP 161-180                                    |              | AQP4 291-310                 |
| OSP 181-200                                    |              | AQP4 301-320                 |
| OSP 21-40                                      |              | AQP4 31-50                   |
| OSP 31-50                                      |              | AQP4 41-60                   |
| OSP 51-70                                      |              | AQP4 51-70                   |
| PO-MaIE                                        |              | AQP4 prot 1                  |
| PLP 11-30                                      |              | AQP4 prot 2                  |
| PLP 131-150                                    |              | Bov ChromograninA            |
| PLP 141-160                                    |              | CNP prot                     |
| PLP 151-170                                    |              | CNPase 356-375               |
| PLP 161-180                                    |              | CNPase 369-388               |
| PLP 181-200                                    |              | CRYAB 131-151                |
| PLP 191-210                                    |              | CRYAB 31-50                  |
| PLP 231-250                                    |              | CRYAB 41-60                  |
| PLP 241-260                                    |              | CRYAB 51-70                  |
| PLP 251-270                                    |              | CRYAB 81-100                 |
| PLP 61-80                                      |              | L1CAM 2                      |
| PLP 71-90                                      |              | MBP 101-120                  |
| PLP 89-106 acet                                |              | MBP 111-129 iso5             |
| PMP2 2                                         |              | MBP 146-170 iso5             |
| PRP                                            |              | MBP 170-191                  |
| PRPH                                           |              | MBP 21-40                    |
| S100B                                          |              | MBP 83-99 iso5               |
| SCN3A Cter                                     |              | mMAG 105-120                 |
| SCN8A Cter                                     |              | MOBP 51-70                   |
| SCN8A L1                                       |              | MOG 11-30                    |
| SCN8A L3                                       |              | MOG 31-50                    |
| SCN8A Nter                                     |              | MOG 71-90                    |
| SNCG                                           |              | MPZ                          |
| TAU                                            |              | Neuropeptide g               |
| TRPV1                                          |              | Neuropeptide K               |
| TUBB3                                          |              | NRCAM                        |
|                                                |              | NTRK1                        |
|                                                |              | OSP 61-80                    |
|                                                |              | OSP 71-90                    |
|                                                |              | PLP 101-120                  |
|                                                |              | PLP 178-197 acet             |
|                                                |              | PLP 261-277                  |
|                                                |              | PLP 31-50                    |

**Supplementary Figure S2: Comparison of IgG reactivity in B cell supernatants vs. plasma samples.** Venn diagram indicating the names of significant antigens in the comparisons “ELISpot-neg vs. ELISpot-pos (supernatants)” (orange) and “HC/OND vs. MS (plasma)” (blue), corresponding to Fig. 2C.

Plasma  
HC / OND vs. MS

|                                                                                                                                                                                                                                                                                                                                                                                                                                                                                                                                                                                  |                                                                                                                                                                                                                                                                                   |                                                                                                                                                                                                                                                                                                                                                               |
|----------------------------------------------------------------------------------------------------------------------------------------------------------------------------------------------------------------------------------------------------------------------------------------------------------------------------------------------------------------------------------------------------------------------------------------------------------------------------------------------------------------------------------------------------------------------------------|-----------------------------------------------------------------------------------------------------------------------------------------------------------------------------------------------------------------------------------------------------------------------------------|---------------------------------------------------------------------------------------------------------------------------------------------------------------------------------------------------------------------------------------------------------------------------------------------------------------------------------------------------------------|
| <p>AQP4 101-120<br/>AQP4 11-30<br/>AQP4 111-130<br/>AQP4 121-140<br/>AQP4 131-150<br/>AQP4 141-160<br/>AQP4 151-170<br/>AQP4 171-190<br/>AQP4 181-200<br/>AQP4 191-210<br/>AQP4 21-40<br/>AQP4 231-250<br/>AQP4 271-290<br/>AQP4 281-300<br/>AQP4 291-310<br/>AQP4 301-320</p>                                                                                                                                                                                                                                                                                                   | <p>AQP4 31-50<br/>AQP4 41-60<br/>AQP4 51-70<br/>AQP4 prot 1<br/>AQP4 prot 2<br/>Bov ChromograninA<br/>CNP prot<br/>CNPase 356-375<br/>CNPase 369-388<br/>CRYAB 131-151<br/>CRYAB 31-50<br/>CRYAB 51-70<br/>CRYAB 81-100<br/>L1CAM 2<br/>MBP 111-129 iso5<br/>MBP 146-170 iso5</p> | <p>MBP 170-191<br/>MBP 83-99 iso5<br/>mMAG 105-120<br/>MOG 11-30<br/>MOG 71-90<br/>MPZ<br/>Neuropeptide g<br/>Neuropeptide K<br/>NRCAM<br/>NTRK1<br/>OSP 61-80<br/>OSP 71-90<br/>PLP 101-120<br/>PLP 178-197 acet<br/>PLP 261-277<br/>PLP 31-50</p>                                                                                                           |
| <p>AQP4 221-240<br/>AQP4 71-90<br/>CRYAB 71-91<br/>CRYAB 91-110<br/>mMAG 97-112<br/>PLP 171-190</p>                                                                                                                                                                                                                                                                                                                                                                                                                                                                              | <p>CRYAB 21-40<br/>PLP 1-20<br/>PLP 211-230</p>                                                                                                                                                                                                                                   | <p>AQP4 201-220<br/>AQP4 261-280<br/>CRYAB 41-60<br/>MBP 101-120<br/>MBP 21-40<br/>MOBP 51-70<br/>MOG 31-50</p>                                                                                                                                                                                                                                               |
| <p>AQP4 61-80<br/>CRYAB 1-20<br/>MBP<br/>MBP 130-151<br/>MBP 71-90<br/>MBP 81-100<br/>MOBP 141-160<br/>MOBP 61-80<br/>MOG 101-120<br/>NEFH<br/>NEFL<br/>OSP 121-140<br/>OSP 131-150<br/>OSP 161-180<br/>OSP 181-200<br/>OSP 21-40<br/>OSP 31-50<br/>P0-MalE<br/>PLP 11-30<br/>PLP 131-150<br/>PLP 151-170<br/>PLP 161-180<br/>PLP 181-200<br/>PLP 191-210<br/>PLP 231-250<br/>PLP 241-260<br/>PLP 251-270<br/>PLP 61-80<br/>PLP 71-90<br/>PRP<br/>PRPH<br/>S100B<br/>SCN3A Cter<br/>SCN8A Cter<br/>SCN8A L1<br/>SCN8A L3<br/>SCN8A Nter<br/>SNCG<br/>TAU<br/>TRPV1<br/>TUBB3</p> | <p>AQP4 91-110<br/>MOBP 21-40<br/>MOG 91-110<br/>OSP 51-70<br/>PLP 141-160<br/>PLP 89-106 acet<br/>PMP2 2</p>                                                                                                                                                                     | <p>ADCYAP1 38<br/>AQP4 241-260<br/>CRYAB 11-30<br/>CRYAB 110-131<br/>MBP 107-127<br/>MBP 11-30<br/>MBP 160-181<br/>MBP 51-70<br/>MBP 61-80<br/>MBP 91-110<br/>MOBP 1-20<br/>MOBP 171-183<br/>MOBP 51-70<br/>MOG 41-60<br/>MOG Nterm<br/>OSP 171-190<br/>OSP 191-210<br/>PLP 139-154 acet<br/>PLP 201-220<br/>PLP 41-60<br/>PLP 91-110<br/>PMP2 1<br/>TAC1</p> |
|                                                                                                                                                                                                                                                                                                                                                                                                                                                                                                                                                                                  |                                                                                                                                                                                                                                                                                   | <p>Supernatants<br/>ELISpot-neg vs.<br/>ELISpot-pos<br/>Cohort 2</p>                                                                                                                                                                                                                                                                                          |

Supernatants  
ELISpot-neg vs.  
ELISpot-pos  
Cohort 1

**Supplementary Figure S3: Comparison of IgG reactivity in B cell supernatants (2 cohorts) vs. plasma samples.** Venn diagram showing the names of significant antigens in the comparisons “ELISpot-neg vs. ELISpot-pos (supernatants, cohort 1)” (orange), “ELISpot-neg vs. ELISpot-pos (supernatants, cohort 2)” (green), and “HC/OND vs. MS (plasma)” (blue), corresponding to Fig. 3B.

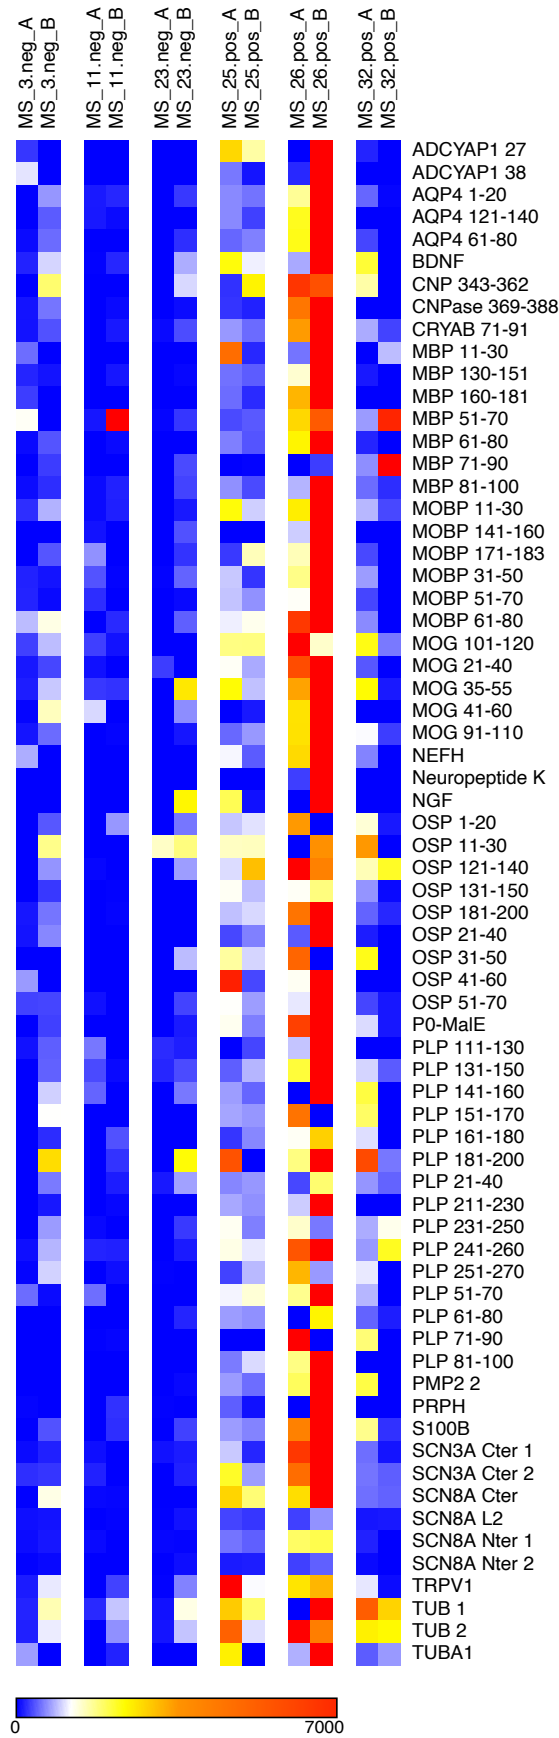

**Supplementary Figure S4: Intra-individual comparison of IgG reactivity in B cell supernatants (2 timepoints).** Heatmap of antibody reactivity (MFI) against 57 myelin \_ntigens, determined significantly different between ELISpot-neg vs. ELISpot-pos B cell supernatants in SAM analysis. 2 timepoints are shown for each patient. Sample collection for time point \_B was performed 3 months after time point \_A.



Table S2.

**Demographics of healthy controls**

| <b>Study ID</b> | <b>Gender</b> | <b>Age</b> |
|-----------------|---------------|------------|
| HC_1            | f             | 54         |
| HC_2            | f             | 30         |
| HC_3            | f             | 58         |
| HC_4            | f             | 29         |
| HC_5            | f             | 24         |
| HC_6            | f             | 34         |
| HC_7            | f             | 27         |
| HC_8            | f             | 35         |
| HC_9            | f             | 40         |
| HC_10           | m             | 30         |

Table S3.

**Supplementary Table 3. Demographics of other neurological disease patients**

| <b>Study ID</b> | <b>Gender</b> | <b>Age</b> | <b>Diagnosis</b>                     |
|-----------------|---------------|------------|--------------------------------------|
| OND_1           | m             | 33         | Stroke                               |
| OND_2           | f             | 26         | Migraine                             |
| OND_3           | m             | 67         | Transient ischemic attack            |
| OND_4           | f             | 78         | Transient global amnesia             |
| OND_5           | m             | 71         | Vestibular vertigo                   |
| OND_6           | f             | 54         | Parkinson's disease                  |
| OND_7           | f             | 66         | Parkinson's disease                  |
| OND_8           | f             | 67         | Myopathy                             |
| OND_9           | m             | 44         | Myopathy                             |
| OND_10          | f             | 72         | Trigeminal neuralgia                 |
| OND_11          | m             | 74         | Epilepsia                            |
| OND_12          | f             | 72         | Benign paroxysmal positional vertigo |
| OND_13          | f             | 65         | Epilepsia                            |
| OND_14          | f             | 52         | Polyneuropathy                       |



Table S4.

Supplementary Table 4. Demographics of MS patients (cohort 1)

| Study ID  | Gender | Age | Disease Duration (yr) | EDSS | Treatment           |
|-----------|--------|-----|-----------------------|------|---------------------|
| MS_1.neg  | f      | 25  | 1                     | 2    | None                |
| MS_2.neg  | f      | 33  | 1                     | 2    | None                |
| MS_3.neg  | f      | 35  | 11                    | 7    | Natalizumab         |
| MS_4.neg  | m      | 41  | 10                    | 3.5  | Natalizumab         |
| MS_5.neg  | f      | 34  | 9                     | 2    | Natalizumab         |
| MS_6.neg  | f      | 54  | 8                     | 2    | Glatiramer acetate  |
| MS_7.neg  | f      | 42  | 4.50                  | 2    | Glatiramer acetate  |
| MS_8.neg  | f      | 46  | 2.5                   | 5.5  | Natalizumab         |
| MS_9.neg  | m      | 32  | 6                     | 2    | Natalizumab         |
| MS_10.neg | f      | 50  | 3                     | 3.5  | Interferon- $\beta$ |
| MS_11.neg | f      | 43  | 16                    | 4    | Glatiramer acetate  |
| MS_12.neg | m      | 54  | 18                    | 5    | None                |
| MS_13.neg | f      | 33  | 1                     | 2.5  | None                |
| MS_14.neg | f      | 36  | 2                     | 0    | Glatiramer acetate  |
| MS_15.neg | f      | 28  | 2                     | 1    | Glatiramer acetate  |
| MS_16.neg | f      | 32  | 2                     | 2    | Interferon- $\beta$ |
| MS_17.neg | m      | 58  | 0.5                   | 3    | Interferon- $\beta$ |
| MS_18.neg | f      | 30  | 1                     | 4    | Natalizumab         |
| MS_19.neg | f      | 23  | 0                     | 0    | Glatiramer acetate  |
| MS_20.neg | f      | 46  | 1                     | 2    | None                |
| MS_21.neg | f      | 36  | 1                     | 2    | Interferon- $\beta$ |
| MS_22.neg | f      | 51  | 13                    | 6    | Fingolimod          |
| MS_23.neg | m      | 46  | 5                     | 4    | Natalizumab         |
| MS_24.pos | m      | 35  | 6                     | 3    | Glatiramer acetate  |
| MS_25.pos | m      | 25  | 3                     | 2.5  | Glatiramer acetate  |
| MS_26.pos | f      | 33  | 11                    | 6    | Natalizumab         |
| MS_27.pos | f      | 51  | 4.5                   | 3    | Natalizumab         |
| MS_28.pos | m      | 28  | 5                     | 2    | Natalizumab         |
| MS_29.pos | f      | 36  | 5                     | 3    | None                |
| MS_30.pos | m      | 39  | 5.5                   | 2    | Natalizumab         |
| MS_31.pos | f      | 30  | 3                     | 0    | Glatiramer acetate  |
| MS_32.pos | f      | 18  | 3                     | 1    | Natalizumab         |
| MS_33.pos | f      | 49  | 2                     | 2    | Interferon- $\beta$ |
| MS_34.pos | f      | 63  | 15                    | 6.5  | Interferon- $\beta$ |
| MS_35.pos | f      | 54  | 4                     | 5.5  | None                |
| MS_36.pos | m      | 49  | 7                     | 2    | Natalizumab         |

Table S5.

Supplementary Table 5. Demographics of MS patients (cohort 2)

| Study ID  | Gender | Age | Disease Duration (yrs) | EDSS | Treatment           |
|-----------|--------|-----|------------------------|------|---------------------|
| MS_1v.neg | m      | 39  | 13                     | 1    | Interferon- $\beta$ |
| MS_2v.neg | f      | 50  | 8                      | 2    | Teriflunomide       |
| MS_3v.neg | f      | 38  | 9                      | 2.5  | Dimethyl fumarate   |
| MS_4v.neg | f      | 67  | 8.5                    | 1    | Glatiramer acetate  |
| MS_5v.neg | f      | 45  | 6.5                    | 1.5  | Interferon- $\beta$ |
| MS_6v.neg | f      | 31  | 6                      | 0    | Teriflunomide       |
| MS_1v.pos | m      | 39  | 9                      | 0    | Interferon- $\beta$ |
| MS_2v.pos | f      | 48  | 2.5                    | 2    | Glatiramer acetate  |
| MS_3v.pos | m      | 38  | 6                      | 0    | Glatiramer acetate  |
| MS_4v.pos | f      | 48  | 26                     | 4    | None                |
| MS_5v.pos | f      | 51  | 6                      | 2    | Glatiramer acetate  |
| MS_6v.pos | f      | 46  | 14                     | 0    | Glatiramer acetate  |
| MS_7v.pos | f      | 47  | 12                     | 2    | Glatiramer acetate  |
| MS_8v.pos | f      | 34  | 4                      | 0    | None                |
